# Supplementary material for: Unique surface modified aramid fibers with improved flame retardancy, tensile properties, surface activity and UV-resistance through in situ formation of hyperbranched polysiloxane–Ce0.8Ca0.2O1.8 hybrids
Source: Royal Society of Chemistry journal article supplement (doi:10.1039/c5ta01690h), 2015-01-01
Supplement: c5ta01690h1.pdf [file c5ta01690h1.pdf]

Supplementary Material (ESI) for Journal of Materials Chemistry A  
This journal is © The Royal Society of Chemistry 2015

### Supporting Information

Table S1. Typical thermodegradation data of UV-KF, UV-HSi@KF, UV-  
 $\text{Ce}_{0.8}\text{Ca}_{0.2}\text{O}_{1.8}$ @KF1 and UV-HSi- $\text{Ce}_{0.8}\text{Ca}_{0.2}\text{O}_{1.8}$ @KF1

| Fiber                                                        | $T_{di}$ (°C) | $T_{max}$ (°C) | $Y_c$ at 800 °C (wt%) |
|--------------------------------------------------------------|---------------|----------------|-----------------------|
| UV-KF                                                        | 388.1         | 541.5          | 49.95                 |
| UV-HSi@KF                                                    | 462.4         | 542.8          | 59.00                 |
| UV- $\text{Ce}_{0.8}\text{Ca}_{0.2}\text{O}_{1.8}$ @KF1      | 455.6         | 542.7          | 54.83                 |
| UV- HSi- $\text{Ce}_{0.8}\text{Ca}_{0.2}\text{O}_{1.8}$ @KF1 | 484.7         | 542.6          | 58.78                 |
